# Supplementary material for: Synergistic effect of polysaccharides and flavonoids on lipid and gut microbiota in hyperlipidemic rats
Source: Royal Society of Chemistry journal article supplement (doi:10.1039/d2fo03031d), 2022-12-20
Supplement: d2fo03031d1.pdf [file d2fo03031d1.pdf]

Table S1 Polyphenols of HFL samples determined by UPLC-MS/MS.

| Compounds                        | CAS        | Formula              | Ionization model   | Peak area |
|----------------------------------|------------|----------------------|--------------------|-----------|
| <b>Alkaloids</b>                 |            |                      |                    |           |
| Piperidine                       | 110-89-4   | C5H11N               | [M+H] <sup>+</sup> | 2.08E+06  |
| Putrescine                       | 110-60-1   | C4H12N2              | [M+H] <sup>+</sup> | 7.34E+04  |
| L-Azetidine-2-carboxylic acid    | 2133-34-8  | C4H7NO2              | [M+H] <sup>+</sup> | 2.93E+05  |
| Cadaverine                       | 462-94-2   | C5H14N2              | [M+H] <sup>+</sup> | 6.32E+04  |
| Choline                          | 62-49-7    | C5H14NO <sup>+</sup> | [M] <sup>+</sup>   | 1.68E+06  |
| Diethanolamine                   | 111-42-2   | C4H11NO2             | [M+H] <sup>+</sup> | 3.13E+04  |
| Histamine                        | 51-45-6    | C5H9N3               | [M+H] <sup>+</sup> | 2.16E+04  |
| N-Benzylmethylene isomethylamine | -          | C8H9N                | [M+H] <sup>+</sup> | 1.84E+06  |
| 2-Phenylethylamine               | 156-28-5   | C8H11N               | [M+H] <sup>+</sup> | 1.63E+06  |
| N-Acetylputrescine               | 18233-70-0 | C6H14N2O             | [M+H] <sup>+</sup> | 2.66E+04  |
| Agmatine                         | 306-60-5   | C5H14N4              | [M+H] <sup>+</sup> | 2.46E+04  |
| N-benzylformamide                | 6343-54-0  | C8H9NO               | [M+H] <sup>+</sup> | 1.26E+05  |
| 6-Methylnicotinamide             | 6960-22-1  | C7H8N2O              | [M+H] <sup>+</sup> | 6.15E+04  |
| L-Tyramine                       | 51-67-2    | C8H11NO              | [M+H] <sup>+</sup> | 6.75E+05  |
| 6-Hydroxynicotinic acid          | 5006-66-6  | C6H5NO3              | [M+H] <sup>+</sup> | 1.38E+05  |
| O-Phosphorylethanolamine         | 1071-23-4  | C2H8NO4P             | [M-H] <sup>-</sup> | 7.32E+04  |
| Histidinol                       | 501-28-0   | C6H11N3O             | [M+H] <sup>+</sup> | 2.77E+07  |
| N-Acetylcadaverine               | 32343-73-0 | C7H16N2O             | [M+H] <sup>+</sup> | 9.01E+05  |
| Indole-3-carboxaldehyde          | 487-89-8   | C9H7NO               | [M+H] <sup>+</sup> | 3.24E+04  |
| Dopamine                         | 51-61-6    | C8H11NO2             | [M+H] <sup>+</sup> | 1.24E+05  |
| 4,6-Dihydroxyquinoline           | 3517-61-1  | C9H7NO2              | [M+H] <sup>+</sup> | 3.51E+04  |
| Indole-3-carboxylic acid         | 771-50-6   | C9H7NO2              | [M-H] <sup>-</sup> | 1.06E+04  |
| DL-2-Aminoadipic acid            | 542-32-5   | C6H11NO4             | [M+H] <sup>+</sup> | 1.17E+05  |
| Indole-3-acetic acid (IAA)       | 87-51-4    | C10H9NO2             | [M+H] <sup>+</sup> | 1.25E+04  |
| 3-Indoleacrylic acid             | 1204-06-4  | C11H9NO2             | [M+H] <sup>+</sup> | 1.73E+06  |
| N-(4-Aminobutyl)benzamide        | 5692-23-9  | C11H16N2O            | [M+H] <sup>+</sup> | 7.94E+04  |
| Spermine                         | 71-44-3    | C10H26N4             | [M+H] <sup>+</sup> | 2.62E+07  |
| O-Acetyl-L-carnitine             | 3040-38-8  | C9H17NO4             | [M+H] <sup>+</sup> | 2.20E+05  |
| 1-Methoxy-indole-3-acetamide     | -          | C11H12N2O2           | [M+H] <sup>+</sup> | 4.40E+06  |

|                                                 |             |            |                    |          |
|-------------------------------------------------|-------------|------------|--------------------|----------|
| Methoxyindoleacetic acid                        | 3471-31-6   | C11H11NO3  | [M+H] <sup>+</sup> | 6.81E+04 |
| Methyl dioxindole-3-acetate                     | 57061-18-4  | C11H11NO4  | [M+H] <sup>+</sup> | 8.54E+04 |
| N-Caffeoylputrescine                            | 29554-26-5  | C13H18N2O3 | [M+H] <sup>+</sup> | 2.67E+05 |
| N-Feruloylputrescine                            | 501-13-3    | C14H20N2O3 | [M+H] <sup>+</sup> | 9.86E+04 |
| Stearamide                                      | 124-26-5    | C18H37NO   | [M+H] <sup>+</sup> | 1.57E+05 |
| Nicotianamine                                   | 34441-14-0  | C12H21N3O6 | [M+H] <sup>+</sup> | 1.88E+04 |
| N-Oleylethanolamine                             | 111-58-0    | C20H39NO2  | [M+H] <sup>+</sup> | 7.99E+04 |
| 10-Formyltetrahydrofolic Acid                   | 2800-34-2   | C20H23N7O7 | [M+H] <sup>+</sup> | 1.05E+05 |
| N1,N8-Bis(sinapoyl)spermidine                   | -           | C29H39N3O8 | [M+H] <sup>+</sup> | 3.93E+06 |
| <b>Flavonoids</b>                               |             |            |                    |          |
| 3',4',7-Trihydroxyflavone                       | 2150-11-0   | C15H10O5   | [M+H] <sup>+</sup> | 9.00E+00 |
| Naringenin (5,7,4'-Trihydroxyflavanone)         | 480-41-1    | C15H12O5   | [M-H] <sup>-</sup> | 1.92E+04 |
| Phloretin                                       | 60-82-2     | C15H14O5   | [M-H] <sup>-</sup> | 8.18E+05 |
| Epiafzelechin                                   | 24808-04-6  | C15H14O5   | [M+H] <sup>+</sup> | 2.68E+04 |
| Kaempferol (3,5,7,4'-Tetrahydroxyflavone)       | 520-18-3    | C15H10O6   | [M+H] <sup>+</sup> | 1.08E+04 |
| Luteolin (5,7,3',4'-Tetrahydroxyflavone)        | 491-70-3    | C15H10O6   | [M-H] <sup>-</sup> | 2.48E+04 |
| Eriodictyol (5,7,3',4'-Tetrahydroxyflavanone)   | 552-58-9    | C15H12O6   | [M-H] <sup>-</sup> | 1.12E+05 |
| Epicatechin                                     | 490-46-0    | C15H14O6   | [M+H] <sup>+</sup> | 3.30E+06 |
| 4'-Hydroxy-5,7-dimethoxyflavanone               | -           | C17H16O5   | [M-H] <sup>-</sup> | 1.57E+07 |
| 6-Hydroxyluteolin                               | 18003-33-3  | C15H10O7   | [M-H] <sup>-</sup> | 1.05E+05 |
| Morin                                           | 480-16-0    | C15H10O7   | [M-H] <sup>-</sup> | 8.27E+06 |
| Quercetin                                       | 117-39-5    | C15H10O7   | [M+H] <sup>+</sup> | 5.79E+05 |
| Dihydrokaempferide                              | 137225-59-3 | C16H14O6   | [M+H] <sup>+</sup> | 2.41E+05 |
| Taxifolin(Dihydroquercetin)                     | 480-18-2    | C15H12O7   | [M-H] <sup>-</sup> | 1.26E+05 |
| 3'-O-Methyl-epicatechin                         | 76549-34-3  | C16H16O6   | [M+H] <sup>+</sup> | 9.00E+00 |
| Epigallocatechin                                | 970-74-1    | C15H14O7   | [M-H] <sup>-</sup> | 3.79E+04 |
| Gallocatechin                                   | 970-73-0    | C15H14O7   | [M+H] <sup>+</sup> | 4.68E+05 |
| Dihydromyricetin (Ampelopsin)                   | 27200-12-0  | C15H12O8   | [M-H] <sup>-</sup> | 2.49E+04 |
| Pinnatifinoside A                               | -           | C21H18O9   | [M+H] <sup>+</sup> | 5.24E+04 |
| Apigenin-6-C-rhamnoside                         | -           | C21H20O9   | [M+H] <sup>+</sup> | 3.67E+04 |
| Apigenin-4'-O-glucoside*                        | -           | C21H20O10  | [M+H] <sup>+</sup> | 1.01E+04 |
| Apigenin-6-C-glucoside (Isovitexin)             | 38953-85-4  | C21H20O10  | [M-H] <sup>-</sup> | 3.41E+05 |
| Apigenin-7-O-glucoside(Cosmosiin)*              | 578-74-5    | C21H20O10  | [M+H] <sup>+</sup> | 1.01E+04 |
| Kaempferol-3-O-rhamnoside (Afzelin)(Kaempferin) | 482-39-3    | C21H20O10  | [M-H] <sup>-</sup> | 1.77E+05 |

|                                                           |            |           |                    |          |
|-----------------------------------------------------------|------------|-----------|--------------------|----------|
| Quercetin-3-O-xyloside (Reynoutrin)*                      | 549-32-6   | C20H18O11 | [M+H] <sup>+</sup> | 4.91E+06 |
| Morin-3-O-lyxoside*                                       | -          | C20H18O11 | [M-H] <sup>-</sup> | 3.45E+06 |
| Avicularin(Quercetin-3-O- $\alpha$ -L-arabinofuranoside)* | 572-30-5   | C20H18O11 | [M+H] <sup>+</sup> | 4.27E+06 |
| Morin-3-O-arabinoside*                                    | -          | C20H18O11 | [M-H] <sup>-</sup> | 3.57E+06 |
| Naringenin-6-C-Glucoside                                  | 3682-03-9  | C21H22O10 | [M+H] <sup>+</sup> | 9.61E+04 |
| Dihydrocharcone-4'-O-glucoside                            | -          | C21H24O10 | [M-H] <sup>-</sup> | 8.38E+05 |
| Phloretin-4'-O-glucoside (Trilobatin)                     | 4192-90-9  | C21H24O10 | [M-H] <sup>-</sup> | 8.60E+06 |
| Epicatechin gallate                                       | 1257-08-5  | C22H18O10 | [M+H] <sup>+</sup> | 1.95E+04 |
| Isorhamnetin-3-O-arabinoside                              | -          | C21H20O11 | [M+H] <sup>+</sup> | 2.66E+04 |
| Kaempferol-3-O-glucoside (Astragaln)*                     | 480-10-4   | C21H20O11 | [M+H] <sup>+</sup> | 8.89E+06 |
| Luteolin-3'-O-glucoside*                                  | 5154-41-6  | C21H20O11 | [M+H] <sup>+</sup> | 1.04E+07 |
| Kaempferol-4'-O-glucoside*                                | -          | C21H20O11 | [M+H] <sup>+</sup> | 6.82E+05 |
| Quercetin-3-O-rhamnoside(Quercitrin)                      | 522-12-3   | C21H20O11 | [M+H] <sup>+</sup> | 5.45E+05 |
| Luteolin-8-C-glucoside (Orientin)                         | 28608-75-5 | C21H20O11 | [M+H] <sup>+</sup> | 1.14E+05 |
| Luteolin-4'-O-glucoside*                                  | 6920-38-3  | C21H20O11 | [M+H] <sup>+</sup> | 7.40E+06 |
| Luteolin-6-C-glucoside (Isoorientin)                      | 4261-42-1  | C21H20O11 | [M+H] <sup>+</sup> | 9.06E+04 |
| Dihydrokaempferol-7-O-glucoside                           | -          | C21H22O11 | [M-H] <sup>-</sup> | 1.84E+05 |
| Eriodictyol-3'-O-glucoside                                | -          | C21H22O11 | [M-H] <sup>-</sup> | 3.89E+05 |
| Dihydrokaempferol-3-O-glucoside                           | 1049-08-8  | C21H22O11 | [M+H] <sup>+</sup> | 7.87E+04 |
| Taxifolin-3-O-rhamnoside (Astilbin)                       | 29838-67-3 | C21H22O11 | [M-H] <sup>-</sup> | 5.35E+04 |
| Cinchonain Ib                                             | 85081-24-9 | C24H20O9  | [M+H] <sup>+</sup> | 2.22E+06 |
| Cinchonain Id                                             | 85022-67-9 | C24H20O9  | [M-H] <sup>-</sup> | 2.81E+06 |
| Cinchonain Ia                                             | 85022-69-1 | C24H20O9  | [M+H] <sup>+</sup> | 2.18E+06 |
| Epicatechin glucoside                                     | -          | C21H24O11 | [M-H] <sup>-</sup> | 1.98E+06 |
| Epicatechin-3'-O- $\beta$ -D-glucopyranoside              | -          | C21H24O11 | [M-H] <sup>-</sup> | 1.35E+06 |
| Epicatechin-3-(3''-O-methyl)gallate                       | -          | C23H20O10 | [M-H] <sup>-</sup> | 6.14E+04 |
| Gallocatechin gallate                                     | 4233-96-9  | C22H18O11 | [M+H] <sup>+</sup> | 1.62E+04 |
| Epigallocatechin-3-gallate                                | 989-51-5   | C22H18O11 | [M+H] <sup>+</sup> | 1.62E+04 |
| Luteolin-7-O-glucuronide                                  | 29741-10-4 | C21H18O12 | [M+H] <sup>+</sup> | 3.37E+05 |
| Quercetin-3-O-glucoside (Isoquercitrin)*                  | 482-35-9   | C21H20O12 | [M-H] <sup>-</sup> | 4.87E+06 |
| Rhodiogin                                                 | 94696-39-6 | C21H20O12 | [M+H] <sup>+</sup> | 1.03E+06 |
| Isohyperoside*                                            | 35589-21-0 | C21H20O12 | [M+H] <sup>+</sup> | 6.45E+06 |
| Quercetin-5-O- $\beta$ -D-glucoside                       | -          | C21H20O12 | [M+H] <sup>+</sup> | 5.61E+06 |
| Quercetin-4'-O-glucoside (Spiraeoside)                    | 20229-56-5 | C21H20O12 | [M-H] <sup>-</sup> | 3.86E+07 |

|                                                           |             |           |        |          |
|-----------------------------------------------------------|-------------|-----------|--------|----------|
| Quercetin-7-O-glucoside*                                  | 491-50-9    | C21H20O12 | [M-H]- | 7.72E+06 |
| 6-Hydroxyluteolin 5-glucoside                             | -           | C21H20O12 | [M-H]- | 7.72E+06 |
| Quercetin-3-O-galactoside (Hyperin)*                      | 482-36-0    | C21H20O12 | [M+H]+ | 5.81E+06 |
| Taxifolin-3'-O-glucoside                                  | 31106-05-5  | C21H22O12 | [M-H]- | 1.05E+05 |
| Galloylisorhamnetin                                       | -           | C23H16O11 | [M+H]+ | 4.55E+04 |
| Isorhamnetin-3-O-gallate                                  | -           | C23H16O11 | [M+H]+ | 4.28E+04 |
| Quercetin-4'-O-glucuronide                                | 201463-36-7 | C21H18O13 | [M-H]- | 5.72E+05 |
| Isorhamnetin-7-O-glucoside (Brassicin)*                   | 6743-96-0   | C22H22O12 | [M+H]+ | 1.49E+06 |
| Rhamnetin-3-O-Glucoside                                   | 27875-34-9  | C22H22O12 | [M+H]+ | 1.53E+06 |
| Isorhamnetin-3-O-Glucoside*                               | 5041-82-7   | C22H22O12 | [M+H]+ | 1.63E+06 |
| Quercetagenin-7-O-glucoside(Quercetagenin)                | 548-75-4    | C21H20O13 | [M+H]+ | 9.16E+04 |
| 3',5',5,7-Tetrahydroxy-4'-methoxyflavanone-3'-O-glucoside | -           | C22H24O12 | [M+H]+ | 6.63E+04 |
| Kaempferol-3-O-(6''-acetyl)glucoside                      | -           | C23H22O12 | [M-H]- | 3.14E+05 |
| Quercetin-3-O-(6''-O-acetyl)glucoside                     | -           | C23H22O13 | [M+H]+ | 1.73E+05 |
| Quercetin-3-O-(6''-O-acetyl)galactoside                   | -           | C23H22O13 | [M-H]- | 2.18E+06 |
| Kaempferol-3-O-(6''-malonyl)galactoside*                  | -           | C24H22O14 | [M+H]+ | 1.57E+06 |
| Kaempferol-3-O-(6''-malonyl)glucoside*                    | -           | C24H22O14 | [M+H]+ | 1.59E+06 |
| Quercetin-7-O-(6''-malonyl)glucoside                      | -           | C24H22O15 | [M+H]+ | 9.70E+06 |
| Epicatechin-epiafzelechin                                 | -           | C30H26O11 | [M-H]- | 2.94E+05 |
| Isorhamnetin-3-O-(6''-malonyl)glucoside                   | -           | C25H24O15 | [M+H]+ | 1.68E+05 |
| Myricetin-3-O-(6''-malonyl)glucoside                      | -           | C24H22O16 | [M+H]+ | 7.45E+03 |
| Apigenin-7-O-rutinoside (Isorhoifolin)                    | 552-57-8    | C27H30O14 | [M+H]+ | 2.38E+06 |
| Isovitexin-2''-O-rhamnoside                               | -           | C27H30O14 | [M+H]+ | 1.99E+05 |
| Vitexin-2''-O-rhamnoside                                  | 64820-99-1  | C27H30O14 | [M+H]+ | 4.17E+06 |
| Kaempferol-3,7-O-dirhamnoside (Kaempferitrin)             | 482-38-2    | C27H30O14 | [M+H]+ | 4.83E+06 |
| Epitheflavic acid-3-O-Gallate                             | 34218-97-8  | C28H20O14 | [M-H]- | 3.36E+06 |
| Kaempferol-3-O-sambubioside                               | 27661-51-4  | C26H28O15 | [M+H]+ | 9.67E+04 |
| Luteolin-7-O-glucoside-5-O-arabinoside                    | -           | C26H28O15 | [M+H]+ | 1.56E+04 |
| Naringenin-7-O-Neohesperidoside(Naringin)                 | 10236-47-2  | C27H32O14 | [M-H]- | 2.86E+04 |
| Naringenin-7-O-Rutinoside(Narirutin)                      | 14259-46-2  | C27H32O14 | [M+H]+ | 5.90E+04 |
| 8,8'-Methylenebiscatechin                                 | 81555-08-0  | C31H28O12 | [M+H]+ | 1.45E+06 |
| 7,3'-Di-O-gallyoltricitiflavan                            | -           | C29H22O14 | [M-H]- | 5.91E+04 |
| 7,4'-Di-O-gallyoltricitiflavan                            | -           | C29H22O14 | [M-H]- | 5.34E+04 |

|                                             |             |            |                    |          |
|---------------------------------------------|-------------|------------|--------------------|----------|
| Kaempferol-3-O-rutinoside(Nicotiflorin)     | 17650-84-9  | C27H30O15  | [M+H] <sup>+</sup> | 2.35E+05 |
| Vitexin-2''-O-galactoside                   | -           | C27H30O15  | [M+H] <sup>+</sup> | 4.95E+05 |
| Kaempferol-3-O-glucorhamnoside              | 40437-72-7  | C27H30O15  | [M+H] <sup>+</sup> | 2.48E+05 |
| Apigenin-6,8-di-C-glucoside (Vicenin-2)     | 23666-13-9  | C27H30O15  | [M+H] <sup>+</sup> | 3.08E+05 |
| Kaempferol-3-O-glucoside-7-O-rhamnoside     | -           | C27H30O15  | [M+H] <sup>+</sup> | 2.73E+05 |
| Vitexin-2''-O-glucoside                     | 61360-94-9  | C27H30O15  | [M+H] <sup>+</sup> | 9.55E+04 |
| Luteolin-7-O-neohesperidoside (Lonicerin)   | 25694-72-8  | C27H30O15  | [M+H] <sup>+</sup> | 2.61E+05 |
| Kaempferol-3-O-neohesperidoside             | 32602-81-6  | C27H30O15  | [M+H] <sup>+</sup> | 2.54E+05 |
| Kaempferol-3-O-rhamnosyl(1→2)glucoside      | -           | C27H30O15  | [M+H] <sup>+</sup> | 2.82E+04 |
| Luteolin-6-C-glucoside-7-O-rhamnoside       | -           | C27H30O15  | [M+H] <sup>+</sup> | 2.94E+04 |
| Isosaponarin(Isovitexin-4'-O-glucoside)     | 19416-87-6  | C27H30O15  | [M+H] <sup>+</sup> | 1.15E+05 |
| Cyanidin-3-O-(6''-O-p-Coumaroyl)glucoside   | -           | C30H27O13+ | [M] <sup>+</sup>   | 7.01E+04 |
| Quercetin-3-O-sambubioside                  | 83048-35-5  | C26H28O16  | [M+H] <sup>+</sup> | 5.09E+04 |
| Kaempferol-3-O-(6''-galloyl)glucoside       | 56317-05-6  | C28H24O15  | [M+H] <sup>+</sup> | 3.31E+04 |
| Kaempferol-3-O-(6''-galloyl)galactoside     | -           | C28H24O15  | [M+H] <sup>+</sup> | 1.06E+05 |
| Gallocatechin-(4α→8)-gallocatechin          | -           | C30H26O14  | [M+H] <sup>+</sup> | 1.32E+05 |
| Quercetin-3-O-rutinoside (Rutin)*           | 153-18-4    | C27H30O16  | [M+H] <sup>+</sup> | 7.08E+06 |
| Luteolin-7-O-gentiobioside                  | -           | C27H30O16  | [M+H] <sup>+</sup> | 1.38E+05 |
| Quercetin-3-O-glucoside-7-O-rhamnoside      | -           | C27H30O16  | [M+H] <sup>+</sup> | 7.82E+06 |
| Rhodionidin                                 | -           | C27H30O16  | [M+H] <sup>+</sup> | 2.26E+06 |
| Luteolin-6,8-di-C-glucoside                 | 29428-58-8  | C27H30O16  | [M+H] <sup>+</sup> | 5.44E+04 |
| Quercetin-3-O-robinobioside                 | 52525-35-6  | C27H30O16  | [M-H] <sup>-</sup> | 8.26E+06 |
| Quercetin-7-O-rutinoside*                   | 147714-62-3 | C27H30O16  | [M+H] <sup>+</sup> | 8.77E+06 |
| Kaempferol-3,7-O-diglucoside                | 25615-14-9  | C27H30O16  | [M+H] <sup>+</sup> | 1.38E+05 |
| Luteolin-7,3'-di-O-glucoside                | 52187-80-1  | C27H30O16  | [M+H] <sup>+</sup> | 2.97E+04 |
| Quercetin-3-O-neohesperidoside              | 117611-67-3 | C27H30O16  | [M+H] <sup>+</sup> | 2.09E+06 |
| Isoluteolin-6,8-di-C-glucoside              | -           | C27H30O16  | [M+H] <sup>+</sup> | 1.67E+04 |
| Kaempferol-6,8-di-C-glucoside               | -           | C27H30O16  | [M+H] <sup>+</sup> | 1.23E+04 |
| Isorhamnetin-3-O-rutinoside (Narcissin)     | 604-80-8    | C28H32O16  | [M+H] <sup>+</sup> | 1.84E+05 |
| Sexangularetin-3-O-glucoside-7-O-rhamnoside | -           | C28H32O16  | [M+H] <sup>+</sup> | 2.01E+05 |
| Isorhamnetin-3-O-glucoside-7-O-rhamnoside   | -           | C28H32O16  | [M+H] <sup>+</sup> | 1.15E+04 |
| Quercetin-3-O-sophoroside (Baimaside)       | 18609-17-1  | C27H30O17  | [M+H] <sup>+</sup> | 2.23E+06 |
| 6-Hydroxykaempferol-3,6-O-Diglucoside       | -           | C27H30O17  | [M+H] <sup>+</sup> | 2.20E+06 |
| 6-Hydroxykaempferol-7,6-O-Diglucoside       | -           | C27H30O17  | [M+H] <sup>+</sup> | 1.23E+06 |

|                                                      |            |            |                                     |          |
|------------------------------------------------------|------------|------------|-------------------------------------|----------|
| Quercetin-3,7-Di-O-glucoside                         | -          | C27H30O17  | [M+H] <sup>+</sup>                  | 2.52E+05 |
| Luteolin-7-O-(6''-malonyl)glucoside-5-O-arabinoside  | -          | C29H30O18  | [M+H] <sup>+</sup>                  | 6.48E+03 |
| Kaempferol-3-O-rutinoside-7-O-rhamnoside             | -          | C33H40O19  | [M+H] <sup>+</sup>                  | 6.09E+04 |
| Quercetin-3-O-rutinoside-7-O-rhamnoside              | -          | C33H40O20  | [M+H] <sup>+</sup>                  | 3.27E+04 |
| Quercetin-3-O-(2''-O-Rhamnosyl)rutinoside            | 55696-57-6 | C33H40O20  | [M+H] <sup>+</sup>                  | 5.18E+06 |
| Quercetin-3-O-sophoroside-7-O-rhamnoside             | -          | C33H40O21  | [M+H] <sup>+</sup>                  | 1.55E+04 |
| Quercetin-7-O-rutinoside-4'-O-glucoside              | -          | C33H40O21  | [M+H] <sup>+</sup>                  | 3.68E+04 |
| Quercetin-3-O-rutinoside-7-O-glucoside               | -          | C33H40O21  | [M+H] <sup>+</sup>                  | 6.07E+04 |
| Cyanidin-3-O-(6''-O-feruloyl)glucoside-5-O-glucoside | -          | C37H39O19+ | [M] <sup>+</sup>                    | 9.00E+00 |
| Catechin-catechin-catechin                           | -          | C45H38O18  | [M-H] <sup>-</sup>                  | 1.60E+06 |
| <b>Phenolic acids</b>                                |            |            |                                     |          |
| Benzamide                                            | 55-21-0    | C7H7NO     | [M+H] <sup>+</sup>                  | 4.88E+05 |
| 4-Hydroxybenzaldehyde                                | 123-08-0   | C7H6O2     | [M-H] <sup>-</sup>                  | 2.43E+05 |
| 2-Phenylethanol                                      | 60-12-8    | C8H10O     | [M-H <sub>2</sub> O+H] <sup>+</sup> | 6.54E+05 |
| 1,3,5-Benzenetriol                                   | 108-73-6   | C6H6O3     | [M+H] <sup>+</sup>                  | 2.77E+06 |
| 4-Hydroxyacetophenone                                | 99-93-4    | C8H8O2     | [M-H] <sup>-</sup>                  | 2.16E+04 |
| Phenyl acetate                                       | 122-79-2   | C8H8O2     | [M-H] <sup>-</sup>                  | 2.51E+04 |
| 4-Hydroxybenzoic acid                                | 99-96-7    | C7H6O3     | [M-H] <sup>-</sup>                  | 3.68E+05 |
| Salicylic acid                                       | 69-72-7    | C7H6O3     | [M-H] <sup>-</sup>                  | 2.16E+05 |
| Tyrosol; 4-Hydroxyphenylethanol                      | 501-94-0   | C8H10O2    | [M-H] <sup>-</sup>                  | 2.73E+04 |
| 4-Nitrophenol                                        | 100-02-7   | C6H5NO3    | [M+H] <sup>+</sup>                  | 8.58E+06 |
| 1-Naphthol*                                          | 90-15-3    | C10H8O     | [M-H] <sup>-</sup>                  | 3.34E+04 |
| 2-Naphthol*                                          | 135-19-3   | C10H8O     | [M-H] <sup>-</sup>                  | 3.64E+04 |
| Phthalic anhydride                                   | 85-44-9    | C8H4O3     | [M+H] <sup>+</sup>                  | 9.83E+05 |
| Cinnamic acid                                        | 140-10-3   | C9H8O2     | [M-H] <sup>-</sup>                  | 6.41E+03 |
| 2-Methoxy-4-ethenylphenol                            | 7786-61-0  | C9H10O2    | [M+H] <sup>+</sup>                  | 1.43E+05 |
| 4'-Hydroxypropiophenone                              | 70-70-2    | C9H10O2    | [M-H] <sup>-</sup>                  | 1.51E+04 |
| 4-Allylcatechol                                      | 1126-61-0  | C9H10O2    | [M-H] <sup>-</sup>                  | 9.08E+03 |
| p-Coumaryl alcohol                                   | 3690-05-9  | C9H10O2    | [M-H] <sup>-</sup>                  | 4.39E+05 |
| 3-Methoxybenzoic acid                                | 586-38-9   | C8H8O3     | [M-H] <sup>-</sup>                  | 1.69E+04 |
| Methyl 4-hydroxybenzoate                             | 99-76-3    | C8H8O3     | [M-H] <sup>-</sup>                  | 2.86E+04 |
| Isovanillin                                          | 621-59-0   | C8H8O3     | [M+H] <sup>+</sup>                  | 7.91E+04 |
| 2,3-Dihydroxybenzoic Acid*                           | 303-38-8   | C7H6O4     | [M-H] <sup>-</sup>                  | 7.35E+06 |
| 3,4-Dihydroxybenzoic acid (Protocatechuic acid)*     | 99-50-3    | C7H6O4     | [M-H] <sup>-</sup>                  | 7.39E+06 |

|                                           |             |          |        |          |
|-------------------------------------------|-------------|----------|--------|----------|
| 2,5-Dihydroxybenzoic acid; Gentisic Acid* | 490-79-9    | C7H6O4   | [M-H]- | 3.72E+06 |
| 3,4-dihydroxy phenylethanol               | -           | C8H10O3  | [M+H]+ | 1.81E+04 |
| 4-Methoxycinnamaldehyde                   | 1963-36-6   | C10H10O2 | [M+H]+ | 5.31E+04 |
| Caffeic aldehyde                          | 141632-15-7 | C9H8O3   | [M+H]+ | 2.66E+05 |
| p-Coumaric acid                           | 501-98-4    | C9H8O3   | [M+H]+ | 2.33E+05 |
| 3-Hydroxycinnamic Acid                    | 14755-02-3  | C9H8O3   | [M-H]- | 5.47E+05 |
| 2-(Formylamino)benzoic acid               | 3342-77-6   | C8H7NO3  | [M-H]- | 1.68E+05 |
| 5,7-Dihydroxy-1(3H)-isobenzofuranone      | 27979-58-4  | C8H6O4   | [M-H]- | 1.69E+06 |
| Terephthalic acid                         | 100-21-0    | C8H6O4   | [M-H]- | 1.69E+06 |
| 3-(4-Hydroxyphenyl)-propionic acid        | 501-97-3    | C9H10O3  | [M-H]- | 1.34E+04 |
| 2,3-Dimethoxybenzaldehyde                 | 86-51-1     | C9H10O3  | [M+H]+ | 8.28E+03 |
| 2,6-Dimethoxybenzaldehyde                 | 3392-97-0   | C9H10O3  | [M-H]- | 1.34E+04 |
| Ethylparaben                              | 120-47-8    | C9H10O3  | [M-H]- | 1.45E+04 |
| 1-(4-Methoxyphenyl)-1-propanol            | 5349-60-0   | C10H14O2 | [M-H]- | 7.59E+04 |
| Homogentisic acid                         | 451-13-8    | C8H8O4   | [M-H]- | 7.38E+04 |
| 3,4-Dihydroxybenzoic acid                 | 102-32-9    | C8H8O4   | [M-H]- | 1.00E+05 |
| Protocatechuic Acid Methyl Ester          | 2150-43-8   | C8H8O4   | [M-H]- | 7.96E+05 |
| Vanillic acid                             | 121-34-6    | C8H8O4   | [M-H]- | 3.21E+04 |
| 2',4',6'-Trihydroxyacetophenone           | 480-66-0    | C8H8O4   | [M-H]- | 3.92E+05 |
| 2,3,4-Trihydroxybenzoic acid              | 610-02-6    | C7H6O5   | [M-H]- | 1.57E+04 |
| 2,4,6-Trihydroxybenzoic acid              | 83-30-7     | C7H6O5   | [M+H]+ | 6.33E+04 |
| Gallic acid                               | 149-91-7    | C7H6O5   | [M-H]- | 1.35E+06 |
| Trans-4-Hydroxycinnamic Acid Methyl Ester | 19367-38-5  | C10H10O3 | [M-H]- | 1.65E+04 |
| 4-Methoxycinnamic acid                    | 830-09-1    | C10H10O3 | [M-H]- | 1.83E+04 |
| 5-Acetylsalicylic acid                    | 13110-96-8  | C9H8O4   | [M+H]+ | 2.16E+05 |
| Caffeic acid                              | 331-39-5    | C9H8O4   | [M-H]- | 1.62E+06 |
| Propyl 4-hydroxybenzoate                  | 94-13-3     | C10H12O3 | [M-H]- | 2.45E+04 |
| Methyl 2,4-dihydroxyphenylacetate         | 67828-42-6  | C9H10O4  | [M-H]- | 2.36E+04 |
| Vanillic acid methyl ester                | 3943-74-6   | C9H10O4  | [M-H]- | 3.41E+03 |
| Hydroxyphenyllactic acid                  | 306-23-0    | C9H10O4  | [M-H]- | 3.20E+04 |
| 3-O-Methylgallic Acid                     | 3934-84-7   | C8H8O5   | [M-H]- | 2.91E+04 |
| Antiarol; 3,4,5-Trimethoxyphenol          | 642-71-7    | C9H12O4  | [M+H]+ | 9.48E+04 |
| Dimethyl phthalate                        | 131-11-3    | C10H10O4 | [M+H]+ | 1.09E+05 |
| Methyl caffeate                           | 3843-74-1   | C10H10O4 | [M-H]- | 7.75E+04 |

|                                              |             |          |        |          |
|----------------------------------------------|-------------|----------|--------|----------|
| Ferulic acid*                                | 537-98-4    | C10H10O4 | [M-H]- | 4.96E+05 |
| Isoferulic Acid*                             | 25522-33-2  | C10H10O4 | [M-H]- | 7.48E+05 |
| Dihydroferulic Acid                          | 1135-23-5   | C10H12O4 | [M-H]- | 1.57E+04 |
| Syringic acid                                | 530-57-4    | C9H10O5  | [M-H]- | 1.01E+05 |
| 4-Hydroxy-3,5-diisopropylbenzaldehyde        | 10537-86-7  | C13H18O2 | [M+H]+ | 9.00E+00 |
| 2,4-Di-Tert-Butylphenol*                     | 96-76-4     | C14H22O  | [M-H]- | 1.49E+05 |
| 2,6-Di-tert-butylphenol*                     | 128-39-2    | C14H22O  | [M-H]- | 1.45E+05 |
| Ferulic acid methyl ester                    | 2309-07-1   | C11H12O4 | [M-H]- | 6.93E+03 |
| Sinapinaldehyde                              | 4206-58-0   | C11H12O4 | [M-H]- | 2.92E+04 |
| Methyl Syringate                             | 884-35-5    | C10H12O5 | [M-H]- | 1.05E+04 |
| Eudesmic acid (3,4,5-trimethoxybenzoic acid) | 118-41-2    | C10H12O5 | [M+H]+ | 2.69E+04 |
| Ethyl ferulate                               | 4046-02-0   | C12H14O4 | [M-H]- | 8.97E+03 |
| Sinapic acid                                 | 530-59-6    | C11H12O5 | [M-H]- | 2.65E+05 |
| 3,4,5-Trimethoxybenzoic acid methyl ester    | 1916-07-0   | C11H14O5 | [M+H]+ | 9.00E+00 |
| Stilbostemin B                               | 162411-67-8 | C15H16O2 | [M+H]+ | 9.00E+00 |
| Mucic acid Dimethyl Ester                    | -           | C8H14O8  | [M-H]- | 9.29E+05 |
| 3,4,5-Trimethoxycinnamic acid                | 90-50-6     | C12H14O5 | [M-H]- | 5.95E+03 |
| Dibutyl phthalate*                           | 84-74-2     | C16H22O4 | [M+H]+ | 1.60E+07 |
| Diisobutyl phthalate*                        | 84-69-5     | C16H22O4 | [M+H]+ | 1.50E+07 |
| Butyl isobutyl phthalate*                    | 17851-53-5  | C16H22O4 | [M+H]+ | 1.49E+07 |
| Orcinol glucoside                            | 21082-33-7  | C13H18O7 | [M-H]- | 2.80E+05 |
| 3-Hydroxy-5-Methylphenol-1-O-Glucoside       | -           | C13H18O7 | [M-H]- | 3.02E+05 |
| 4-(3,4,5-Trihydroxybenzoxy)benzoic acid      | -           | C14H10O7 | [M-H]- | 8.62E+06 |
| 4-O-Glucosyl-4-hydroxybenzoic acid           | -           | C13H16O8 | [M-H]- | 1.67E+05 |
| Salicylic acid-2-O-glucoside                 | 10366-91-3  | C13H16O8 | [M-H]- | 1.60E+06 |
| Tachioside                                   | 109194-60-7 | C13H18O8 | [M-H]- | 1.81E+06 |
| 4-O-Glucosyl-3,4-dihydroxybenzyl alcohol     | -           | C13H18O8 | [M-H]- | 4.76E+05 |
| 1-O-Caffeoyl xylose                          | -           | C14H16O8 | [M-H]- | 1.16E+05 |
| 2-Acetyl-3-hydroxyphenyl-1-O-glucoside       | -           | C15H20O7 | [M-H]- | 2.81E+06 |
| Methyl salicylate-2-O-glucoside              | 10019-60-0  | C14H18O8 | [M-H]- | 5.18E+05 |
| 1-O-Galloyl-rhamnose                         | -           | C13H16O9 | [M+H]+ | 9.00E+00 |
| Protocatechuic acid-4-O-glucoside*           | -           | C13H16O9 | [M-H]- | 5.77E+06 |
| 1-O-Gentisoyl-β-D-glucoside*                 | 23445-11-6  | C13H16O9 | [M-H]- | 7.60E+06 |
| Vanilloloside                                | 74950-96-2  | C14H20O8 | [M-H]- | 6.63E+06 |



|                                                     |             |           |        |          |
|-----------------------------------------------------|-------------|-----------|--------|----------|
| 5-(2-Hydroxyethyl)-2-O-glucosylphenol               | -           | C14H20O8  | [M-H]- | 3.06E+06 |
| Cimidahurinine                                      | 142542-89-0 | C14H20O8  | [M-H]- | 2.85E+06 |
| 3-O-p-Coumaroylshikimic acid                        | -           | C16H16O7  | [M-H]- | 1.61E+05 |
| Digallic Acid                                       | 536-08-3    | C14H10O9  | [M-H]- | 1.66E+06 |
| 1-O-p-Coumaroyl-β-D-glucose                         | 7139-64-2   | C15H18O8  | [M-H]- | 5.18E+06 |
| (2E)-3-[4-(β-D-glucopyranoside)-phenylacrylic]-acid | -           | C15H18O8  | [M-H]- | 5.00E+05 |
| p-Coumaric acid-4-O-glucoside                       | 117405-48-8 | C15H18O8  | [M-H]- | 3.15E+05 |
| Raspberryketone glucoside                           | 38963-94-9  | C16H22O7  | [M-H]- | 3.84E+05 |
| Citrusin C                                          | 18604-50-7  | C16H22O7  | [M-H]- | 1.96E+04 |
| isoamericanin A                                     | -           | C18H16O6  | [M+H]+ | 3.24E+04 |
| Demethyl coniferin                                  | -           | C15H20O8  | [M-H]- | 4.51E+05 |
| Vanillic acid-4-O-glucoside                         | 32142-31-7  | C14H18O9  | [M-H]- | 9.64E+06 |
| 1-O-Vanilloyl-D-Glucose                             | -           | C14H18O9  | [M-H]- | 2.09E+05 |
| Gallic acid-4-O-glucoside                           | 84274-52-2  | C13H16O10 | [M-H]- | 4.29E+05 |
| 6-O-Galloyl-D-glucose*                              | 13186-19-1  | C13H16O10 | [M-H]- | 1.09E+06 |
| 2-O-Galloyl-D-glucose                               | -           | C13H16O10 | [M-H]- | 8.68E+05 |
| 3-O-Galloyl-D-glucose*                              | -           | C13H16O10 | [M-H]- | 1.15E+06 |
| Koaburaside                                         | 41653-73-0  | C14H20O9  | [M-H]- | 1.42E+06 |
| Galloyl Methyl gallate                              | -           | C15H12O9  | [M-H]- | 1.96E+05 |
| 5-O-Caffeoylshikimic acid                           | 180981-12-8 | C16H16O8  | [M-H]- | 2.30E+05 |
| 1-O-p-Coumaroylquinic acid                          | -           | C16H18O8  | [M-H]- | 7.37E+04 |
| 3-O-p-Coumaroylquinic acid*                         | 87099-71-6  | C16H18O8  | [M-H]- | 7.77E+06 |
| 5-O-p-Coumaroylquinic acid*                         | 1899-30-5   | C16H18O8  | [M-H]- | 3.93E+06 |
| 1-O-Caffeoyl-β-D-glucose                            | 14364-08-0  | C15H18O9  | [M-H]- | 1.12E+06 |
| Syringaldehyde-4-O-glucoside                        | -           | C15H20O9  | [M-H]- | 4.08E+05 |
| Dihydrocaffeoylglucose                              | -           | C15H20O9  | [M-H]- | 2.69E+05 |
| 1-Caffeoylquinic acid                               | 1241-87-8   | C16H18O9  | [M-H]- | 2.02E+07 |
| Cryptochlorogenic acid (4-O-Caffeoylquinic acid)    | 905-99-7    | C16H18O9  | [M-H]- | 3.04E+06 |
| Chlorogenic acid (3-O-Caffeoylquinic acid)          | 327-97-9    | C16H18O9  | [M-H]- | 1.80E+06 |
| Neochlorogenic acid (5-O-Caffeoylquinic acid)       | 906-33-2    | C16H18O9  | [M-H]- | 2.47E+06 |
| 4-O-β-D-glucopyranosylferulic acid                  | -           | C16H20O9  | [M-H]- | 2.39E+06 |
| Homovanilloylquinic acid                            | -           | C16H20O9  | [M-H]- | 1.04E+04 |
| 1-O-Feruloyl-β-D-glucose                            | 7196-71-6   | C16H20O9  | [M-H]- | 2.47E+05 |
| Ferulic acid-4-O-glucoside                          | 117405-51-3 | C16H20O9  | [M-H]- | 3.09E+06 |

---

|                                                                        |             |            |        |          |
|------------------------------------------------------------------------|-------------|------------|--------|----------|
| Glucosyringic Acid                                                     | -           | C15H20O10  | [M-H]- | 9.04E+05 |
| Chlorogenic acid methyl ester                                          | 29708-87-0  | C17H20O9   | [M-H]- | 6.33E+05 |
| 3-Prenyl-4-O-glucosyloxy-4-hydroxybenzoic acid                         | -           | C18H24O8   | [M-H]- | 3.10E+05 |
| Quinacyl syringic acid                                                 | -           | C16H20O10  | [M-H]- | 2.97E+04 |
| Trihydroxycinnamoylquinic acid                                         | -           | C16H20O10  | [M-H]- | 1.14E+05 |
| Awsoniaside B                                                          | -           | C17H24O9   | [M-H]- | 1.19E+05 |
| 4-O-Glucosyl-sinapate                                                  | -           | C17H22O10  | [M-H]- | 1.41E+06 |
| 1-O-Sinapoyl-D-glucose                                                 | -           | C17H22O10  | [M-H]- | 6.79E+05 |
| Bis(2-ethylhexyl)phthalate*                                            | 117-81-7    | C24H38O4   | [M+H]+ | 5.49E+07 |
| Diisooctyl Phthalate*                                                  | 27554-26-3  | C24H38O4   | [M+H]+ | 5.49E+07 |
| Fortuneanoside A                                                       | -           | C19H22O9   | [M-H]- | 7.01E+04 |
| Cimicifugic acid K                                                     | -           | C20H18O9   | [M-H]- | 3.72E+06 |
| Cimicifugic acid C                                                     | 205114-67-6 | C20H18O10  | [M-H]- | 2.02E+06 |
| Benzyl- $\beta$ -gentiobioside                                         | 56775-64-5  | C19H28O11  | [M-H]- | 3.12E+04 |
| Dunalianoside B                                                        | -           | C21H22O11  | [M-H]- | 2.83E+05 |
| 2-O-Salicyl-6-O-Galloyl-D-Glucose                                      | -           | C20H20O12  | [M-H]- | 6.96E+04 |
| Flavogallonic Acid Dilactone                                           | 103744-88-3 | C21H10O12  | [M-H]- | 1.58E+04 |
| Anthranilate-1-O-Sophoroside                                           | -           | C19H27NO12 | [M-H]- | 2.12E+05 |
| Trigallic acid                                                         | 2131-66-0   | C21H14O13  | [M-H]- | 7.79E+05 |
| Monogalloyl-diglucose                                                  | -           | C19H26O15  | [M-H]- | 1.87E+04 |
| 3,6-Di-O-caffeoyl glucose                                              | -           | C24H24O12  | [M-H]- | 1.56E+04 |
| 1,3-O-Dicaffeoylquinic Acid (Cynarin)                                  | 30964-13-7  | C25H24O12  | [M-H]- | 7.78E+05 |
| 6'-O-Feruloyl-D-sucrose                                                | 118230-77-6 | C22H30O14  | [M-H]- | 1.13E+04 |
| Rosmarinic acid-3'-O-glucoside                                         | 910028-78-3 | C24H26O13  | [M-H]- | 2.24E+05 |
| 3,4-Di-O-caffeoylquinic acid methyl ester                              | 114637-83-1 | C26H26O12  | [M+H]+ | 1.98E+04 |
| 6'-O-Sinapoylsucrose                                                   | -           | C23H32O15  | [M-H]- | 1.61E+04 |
| Disinapoyl glucoside                                                   | -           | C28H32O14  | [M-H]- | 9.00E+00 |
| Tetragallic Acid(3''-O-galloyl-4''-O-galloyl-4-O-galloyl-galloyl acid) | -           | C28H18O17  | [M-H]- | 1.58E+04 |
| Syringoylcaffeoylquinic acid-D-glucose                                 | -           | C31H36O18  | [M-H]- | 2.41E+05 |

---

---

Table S2 Composition of the normal diet (NFD) used in the animal experiment

| Ingredients   | Content (%) |
|---------------|-------------|
| Corn Flour    | 25          |
| Flour         | 25          |
| Cereal        | 25          |
| Soybean flour | 10          |
| Fish powder   | 8           |
| Bone meal     | 4           |
| Yeast powder  | 2           |
| Fine salt     | 1           |

Table S3 Composition of the high-fat diet (HFD) used in the animal experiment

| Ingredients | Content (%) |
|-------------|-------------|
| Normal diet | 70.5        |
| Sucrose     | 15          |
| Cholesterol | 1.2         |
| Lard        | 13          |
| Bile salts  | 0.3         |
